# Supplementary material for: Impacts of aerosols on the chemistry of atmospheric trace gases: a case study of peroxides and HO 2 radicals
Source: Copernicus journal article supplement (doi:10.5194/acp-13-11259-2013), 2013-11-20
Supplement: Supplementary file [file acp-13-11259-2013-supplement.pdf]

# Impacts of aerosols on the chemistry of atmospheric trace gases: a case study of peroxides and HO<sub>2</sub> radicals

H. Liang<sup>1</sup>, Z. M. Chen<sup>1</sup>, D. Huang<sup>1</sup>, Y. Zhao<sup>1</sup> and Z. Y. Li<sup>1,2</sup>

<sup>1</sup>State Key Laboratory of Environmental Simulation and Pollution Control, College of Environmental Sciences and Engineering, Peking University, Beijing 100871, China

<sup>2</sup>School of Earth and Space Sciences, Peking University, Beijing 100871, China

*Correspondence to:* Z. M. Chen (zmchen@pku.edu.cn)

## Supplementary material

**Equation S1.** Relationship between bulk and surface concentration of HO<sub>2</sub>

**Table S1.** Aerosol aqueous phase reactions extended in the box model calculation

**Table S2.** Sensitivity of HO<sub>x</sub> and H<sub>2</sub>O<sub>2</sub> concentration to aerosol optical depth (AOD).

**Fig.S1.** Dependence of j-values on aerosol optical depth (AOD).

**Equation S1.** Relationship between bulk and surface concentration of HO<sub>2</sub>

The relationship between bulk and surface concentration of HO<sub>2</sub> could be expressed by the following equation (Mao et al., 2013):

$$[\text{HO}_2]_{surf} = \frac{P_{\text{HO}_2}}{k^l} + \left( [\text{HO}_2]_{bulk} - \frac{P_{\text{HO}_2}}{k^l} \right) \cdot \left[ 3 \left( \frac{\coth q}{q} - \frac{1}{q^2} \right) \right]^{-1} \quad (\text{S1})$$

where  $k^l$  is the first-order loss constant of HO<sub>2</sub>,  $P_{\text{HO}_2}$  is the aqueous-phase production rate of HO<sub>2</sub>, and  $q = a (k^l/D_{aq})^{1/2}$  is the diffuso-reactive parameter, in which  $a$  is the radius of the particles,  $D_{aq}$  is the HO<sub>2</sub> aqueous phase diffusion constant. According to this correction, the surface concentration is 100% to 180% of the bulk concentration, depending on the radius of the particles and the concentrations of TMI.

**Table S1.** Aerosol aqueous phase reactions extended in the box model calculation.

| NO. <sup>1</sup> | Reactions                                                                                                        | k <sub>298</sub>     | Ea/R |
|------------------|------------------------------------------------------------------------------------------------------------------|----------------------|------|
| R1               | $\text{H}_2\text{O}_2 + \text{Fe}^{2+} \rightarrow \text{Fe}^{3+} + \text{OH} + \text{OH}^-$                     | $7.0 \times 10^1$    | 5050 |
| R2               | $\text{H}_2\text{O}_2 + \text{FeO}^{2+} \rightarrow \text{Fe}^{3+} + \text{HO}_2 + \text{OH}^-$                  | $9.5 \times 10^3$    | 2800 |
| R3               | $\text{H}_2\text{O}_2 + \text{Fe}(\text{OH})^+ \rightarrow \text{Fe}(\text{OH})^{2+} + \text{OH} + \text{OH}^-$  | $1.9 \times 10^6$    | 6200 |
| R4               | $\text{H}_2\text{O}_2 + \text{Fe}^{3+} \rightarrow \text{Fe}^{2+} + \text{HO}_2 + \text{H}^+$                    | $2.0 \times 10^{-3}$ |      |
| R5               | $\text{H}_2\text{O}_2 + \text{Fe}(\text{OH})^{2+} \rightarrow \text{Fe}^{2+} + \text{HO}_2 + \text{H}_2\text{O}$ | $2.0 \times 10^{-3}$ |      |
| R6               | $\text{O}_2^- + \text{Fe}^{2+} + 2\text{H}^+ \rightarrow \text{H}_2\text{O}_2 + \text{Fe}^{3+}$                  | $1.0 \times 10^7$    |      |
| R7               | $\text{O}_2^- + \text{Fe}^{3+} \rightarrow \text{Fe}^{2+} + \text{O}_2$                                          | $1.5 \times 10^8$    |      |
| R8               | $\text{O}_2^- + \text{Fe}(\text{OH})^{2+} \rightarrow \text{Fe}^{2+} + \text{O}_2 + \text{OH}^-$                 | $1.5 \times 10^8$    |      |
| R9               | $\text{O}_2^- + \text{Fe}(\text{OH})_2^+ \rightarrow \text{Fe}^{2+} + \text{O}_2 + 2\text{OH}^-$                 | $1.5 \times 10^8$    |      |
| R10              | $\text{HO}_2 + \text{Fe}^{2+} + \text{H}^+ \rightarrow \text{Fe}^{3+} + \text{H}_2\text{O}_2$                    | $1.2 \times 10^6$    | 5050 |
| R11              | $\text{HO}_2 + \text{FeO}^{2+} \rightarrow \text{Fe}^{3+} + \text{O}_2 + \text{OH}^-$                            | $2.0 \times 10^6$    |      |
| R12              | $\text{HO}_2 + \text{Fe}(\text{OH})^{2+} \rightarrow \text{Fe}^{2+} + \text{O}_2 + \text{H}_2\text{O}$           | $1.3 \times 10^5$    |      |
| R13              | $\text{OH} + \text{Fe}^{2+} \rightarrow \text{Fe}(\text{OH})^{2+}$                                               | $4.6 \times 10^8$    | 1100 |
| R14              | $\text{OH} + \text{FeO}^{2+} + \text{H}^+ \rightarrow \text{Fe}^{3+} + \text{H}_2\text{O}_2$                     | $1.0 \times 10^7$    |      |
| R15              | $\text{O}_3 + \text{Fe}^{2+} \rightarrow \text{FeO}^{2+} + \text{O}_2$                                           | $8.2 \times 10^5$    |      |
| R16              | $\text{FeO}^{2+} + \text{H}_2\text{O} \rightarrow \text{Fe}^{3+} + \text{OH} + \text{OH}^-$                      | $1.3 \times 10^{-2}$ | 4100 |
| R17              | $\text{FeO}^{2+} + \text{Fe}^{2+} + \text{H}_2\text{O} \rightarrow 2\text{Fe}^{3+} + 2\text{OH}^-$               | $7.2 \times 10^4$    | 842  |
| R18              | $\text{Cl}_2^- + \text{Fe}^{2+} \rightarrow \text{Fe}^{3+} + 2\text{Cl}^-$                                       | $1.0 \times 10^7$    | 3060 |
| R19              | $\text{O}_2^- + \text{Fe}(\text{SO}_4)^+ \rightarrow \text{Fe}^{2+} + \text{SO}_4^{2-} + \text{O}_2$             | $1.5 \times 10^8$    |      |
| R20              | $\text{HO}_2 + \text{Fe}(\text{SO}_4)^+ \rightarrow \text{Fe}^{2+} + \text{SO}_4^{2-} + \text{O}_2 + \text{H}^+$ | $1.0 \times 10^3$    |      |
| R21              | $\text{Fe}^{3+} + \text{SO}_4^{2-} \rightarrow \text{Fe}(\text{SO}_4)^+$                                         | $3.2 \times 10^3$    |      |
| R22              | $\text{Fe}(\text{SO}_4)^+ \rightarrow \text{Fe}^{3+} + \text{SO}_4^{2-}$                                         | $2.7 \times 10^1$    |      |
| R23              | $\text{OH} + \text{Cu}^+ \rightarrow \text{Cu}^{2+} + \text{OH}^-$                                               | $3.0 \times 10^9$    |      |
| R24              | $\text{O}_2 + \text{Cu}^+ \rightarrow \text{Cu}^{2+} + \text{O}_2^-$                                             | $4.6 \times 10^5$    |      |
| R25              | $\text{H}_2\text{O}_2 + \text{Cu}^+ \rightarrow \text{Cu}^{2+} + \text{OH} + \text{OH}^-$                        | $7.0 \times 10^3$    |      |
| R26              | $\text{HO}_2 + \text{Cu}^+ + \text{H}^+ \rightarrow \text{Cu}^{2+} + \text{H}_2\text{O}_2$                       | $3.5 \times 10^9$    |      |
| R27              | $\text{O}_2^- + \text{Cu}^+ + \text{H}^+ \rightarrow \text{Cu}^{2+} + \text{H}_2\text{O}_2$                      | $9.4 \times 10^9$    |      |
| R28              | $\text{HO}_2 + \text{Cu}^{2+} \rightarrow \text{Cu}^+ + \text{O}_2 + \text{H}^+$                                 | $1.0 \times 10^8$    |      |
| R29              | $\text{O}_2^- + \text{Cu}^{2+} \rightarrow \text{Cu}^+ + \text{O}_2$                                             | $8.0 \times 10^9$    |      |

|     |                                                                                                                      |                        |       |
|-----|----------------------------------------------------------------------------------------------------------------------|------------------------|-------|
| R30 | $\text{HO}_2 + \text{CuSO}_4 \rightarrow \text{Cu}^+ + \text{O}_2 + \text{HSO}_4^-$                                  | $1.0 \times 10^7$      |       |
| R31 | $\text{O}_2^- + \text{CuSO}_4 \rightarrow \text{Cu}^+ + \text{O}_2 + \text{SO}_4^{2-}$                               | $1.0 \times 10^8$      |       |
| R32 | $\text{Fe}^{3+} + \text{Cu}^+ \rightarrow \text{Cu}^{2+} + \text{Fe}^{2+}$                                           | $1.3 \times 10^7$      |       |
| R33 | $\text{Fe}(\text{OH})^{2+} + \text{Cu}^+ \rightarrow \text{Cu}^{2+} + \text{Fe}^{2+} + \text{OH}^-$                  | $3.0 \times 10^7$      |       |
| R34 | $\text{Fe}(\text{OH})^{2+} + \text{Cu}^+ \rightarrow \text{Cu}^{2+} + \text{Fe}^{2+} + 2\text{OH}^-$                 | $1.3 \times 10^7$      |       |
| R35 | $\text{Fe}(\text{SO}_4)^+ + \text{Cu}^+ \rightarrow \text{Cu}^{2+} + \text{Fe}^{2+} + \text{SO}_4^{2-}$              | $1.8 \times 10^6$      |       |
| R36 | $\text{OH} + \text{HO}_2 \rightarrow \text{H}_2\text{O} + \text{O}_2$                                                | $7.0 \times 10^9$      |       |
| R37 | $\text{OH} + \text{O}_2^- \rightarrow \text{OH}^- + \text{O}_2$                                                      | $1.0 \times 10^{10}$   |       |
| R38 | $\text{OH} + \text{H}_2\text{O}_2 \rightarrow \text{H}_2\text{O} + \text{HO}_2$                                      | $2.7 \times 10^7$      |       |
| R39 | $\text{HO}_2 + \text{HO}_2 \rightarrow \text{H}_2\text{O}_2 + \text{O}_2$                                            | $8.6 \times 10^5$      |       |
| R40 | $\text{HO}_2 + \text{O}_2^- \rightarrow \text{H}_2\text{O}_2 + \text{O}_2 + \text{OH}^-$                             | $1.0 \times 10^8$      |       |
| R41 | $\text{O}_3 + \text{O}_2^- + \text{H}_2\text{O} \rightarrow \text{OH} + 2\text{O}_2 + \text{OH}^-$                   | $1.5 \times 10^9$      |       |
| R42 | $\text{SO}_2 + \text{O}_3 + \text{H}_2\text{O} \rightarrow \text{HSO}_4^- + \text{O}_2 + \text{H}^+$                 | $2.4 \times 10^4$      |       |
| R43 | $\text{HSO}_3^- + \text{H}_2\text{O}_2 + \text{H}^+ \rightarrow \text{SO}_4^{2-} + \text{H}_2\text{O} + 2\text{H}^+$ | $6.9 \times 10^7$      | 4000  |
| R44 | $\text{HSO}_3^- + \text{O}_3 \rightarrow \text{HSO}_4^- + \text{O}_2$                                                | $3.7 \times 10^5$      | 5530  |
| R45 | $\text{SO}_3^{2-} + \text{O}_3 \rightarrow \text{SO}_4^{2-} + \text{O}_2$                                            | $1.5 \times 10^9$      | 5280  |
| P1  | $\text{O}_3 + \text{H}_2\text{O} \rightarrow \text{H}_2\text{O}_2 + \text{O}_2$                                      | $2.98 \times 10^{-4}$  |       |
| P2  | $\text{H}_2\text{O}_2 \rightarrow 2\text{OH}$                                                                        | $4.81 \times 10^{-6}$  |       |
| P3  | $\text{Fe}^{3+} + \text{H}_2\text{O} \rightarrow \text{Fe}^{2+} + \text{OH} + \text{H}^+$                            | $6.41 \times 10^{-6}$  |       |
| P4  | $\text{Fe}(\text{OH})^{2+} \rightarrow \text{Fe}^{2+} + \text{OH}$                                                   | $5.63 \times 10^{-3}$  |       |
| E1  | $\text{Fe}^{2+} + \text{H}_2\text{O} \rightleftharpoons \text{Fe}(\text{OH})^+ + \text{H}^+$                         | $3.22 \times 10^{-10}$ |       |
| E2  | $\text{Fe}^{3+} + \text{H}_2\text{O} \rightleftharpoons \text{Fe}(\text{OH})^{2+} + \text{H}^+$                      | $6.0 \times 10^{-3}$   |       |
| E3  | $\text{HO}_2 \rightleftharpoons \text{O}_2^- + \text{H}^+$                                                           | $2.05 \times 10^{-5}$  |       |
| E4  | $\text{H}_2\text{O}_2 \rightleftharpoons \text{HO}_2^- + \text{H}^+$                                                 | $1.6 \times 10^{-12}$  | -3700 |
| E5  | $\text{Cu}^{2+} + \text{SO}_4^{2-} \rightleftharpoons \text{Cu}(\text{SO}_4)$                                        | $2.3 \times 10^2$      |       |
| E6  | $\text{HSO}_4^- \rightleftharpoons \text{SO}_4^{2-} + \text{H}^+$                                                    | $1.02 \times 10^{-2}$  | -2700 |
| E7  | $\text{HSO}_3^- \rightleftharpoons \text{SO}_3^{2-} + \text{H}^+$                                                    | $6.22 \times 10^{-8}$  | -1960 |

<sup>1</sup>R refers to reactions, P refers to photolysis, and E refers to equilibria.

**Table S2.** Sensitivity of HO<sub>x</sub> and H<sub>2</sub>O<sub>2</sub> concentration to aerosol optical depth (AOD).

| AOD | OH (pptv) | HO <sub>2</sub> (pptv) | H <sub>2</sub> O <sub>2</sub> (ppbv) |
|-----|-----------|------------------------|--------------------------------------|
| 0   | 0.60      | 29.7                   | 2.18                                 |
| 1   | 0.26      | 17.0                   | 0.38                                 |
| 2   | 0.08      | 6.3                    | 0.06                                 |
| 3   | 0.03      | 4.5                    | 0.03                                 |
| 4   | 0.02      | 4.4                    | 0.02                                 |
| 5   | 0.01      | 4.8                    | 0.03                                 |

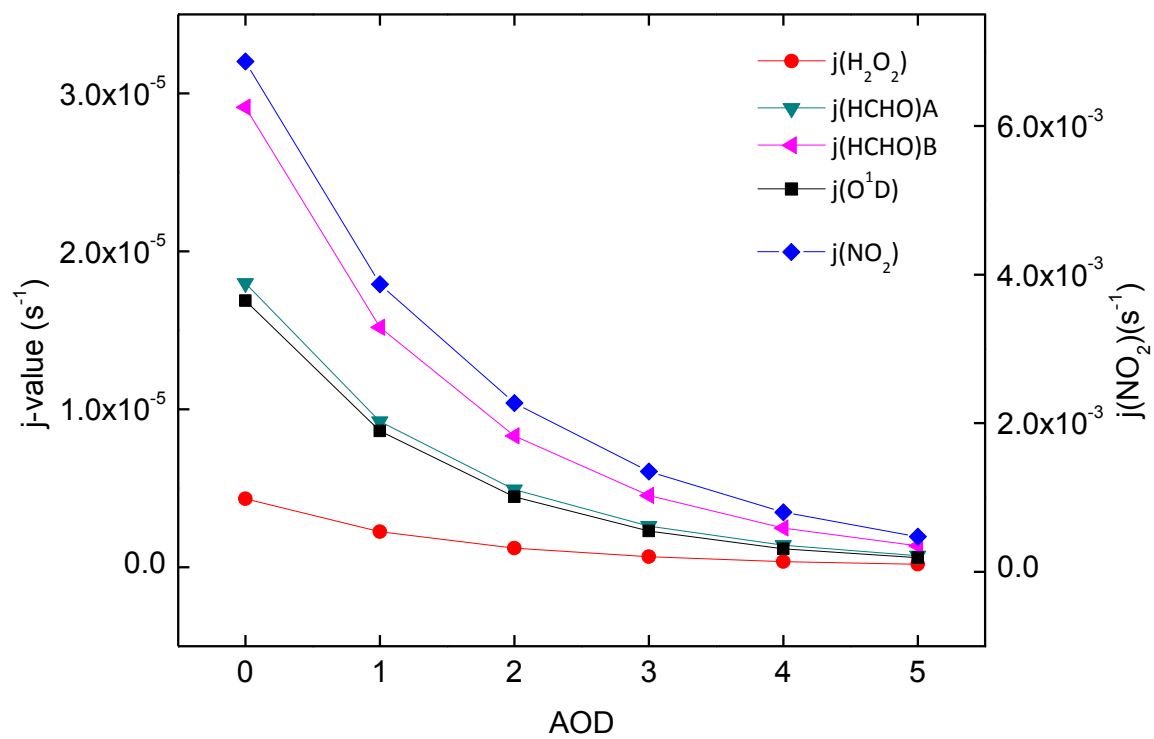

**Fig. S1.** Dependence of j-values on aerosol optical depth (AOD).

## References

- Ervens, B., George, C., Williams, J. E., Buxton, G. V., Salmon, G. A., Bydder, M., Wilkinson, F., Dentener, F., Mirabel, P., Wolke, R., and Herrmann, H.: CAPRAM 2.4 (MODAC mechanism): An extended and condensed tropospheric aqueous phase mechanism and its application, *J. Geophys. Res.*, 108, D14, doi: 10.1029/2002jd002202, 2003
- Mao, J., Fan, S., Jacob, D. J., and Travis, K. R.: Radical loss in the atmosphere from Cu-Fe redox coupling in aerosols, *Atmos. Chem. Phys.*, 13, 509-519, doi: 10.5194/acp-13-509-2013, 2013.
